# Supplementary material for: Chemical and meteorological influences on the lifetime of NO 3 at a semirural mountain site during "PARADE"
Source: Copernicus journal article supplement (doi:10.5194/acp-2016-38), 2016-01-22
Supplement: Supplementary file 1 [file acp-2016-38-supplement.pdf]

# Chemical and meteorological influences on the lifetime of NO<sub>3</sub> at a semi-rural mountain site during “PARADE”

N. Sobanski<sup>1</sup>, M.J. Tang<sup>1,5</sup>, J. Thieser<sup>1</sup>, G. Schuster<sup>1</sup>, D. Poehler<sup>2</sup>, H. Fischer<sup>1</sup>, W. Song<sup>1</sup>, C. Sauvage<sup>1</sup>, J. Williams<sup>1</sup>, J. Fachinger<sup>3</sup>, F. Berkes<sup>4,6</sup>, P. Hoor<sup>4</sup>, U. Platt<sup>2</sup>, J. Lelieveld<sup>1</sup> and J.N. Crowley<sup>1</sup>

<sup>1</sup> Max-Planck-Institut für Chemie, Division of Atmospheric Chemistry, Mainz, Germany.

<sup>2</sup> Institute of Environmental Physics, University of Heidelberg, Germany.

<sup>3</sup> Max-Planck-Institut für Chemie, Division of Particle Chemistry, Mainz, Germany.

<sup>4</sup> Institut Für Atmospheric Physics, Johannes Gutenberg-University Mainz, Germany.

<sup>5</sup> Present affiliation: Chemistry Department, University of Iowa, Iowa, USA.

<sup>6</sup> Present affiliation: Institute of Energy and Climate, Forschungszentrum Jülich, Jülich, Germany.

*Correspondence to:* J. N. Crowley (john.crowley@mpic.de)

Supplementary Information

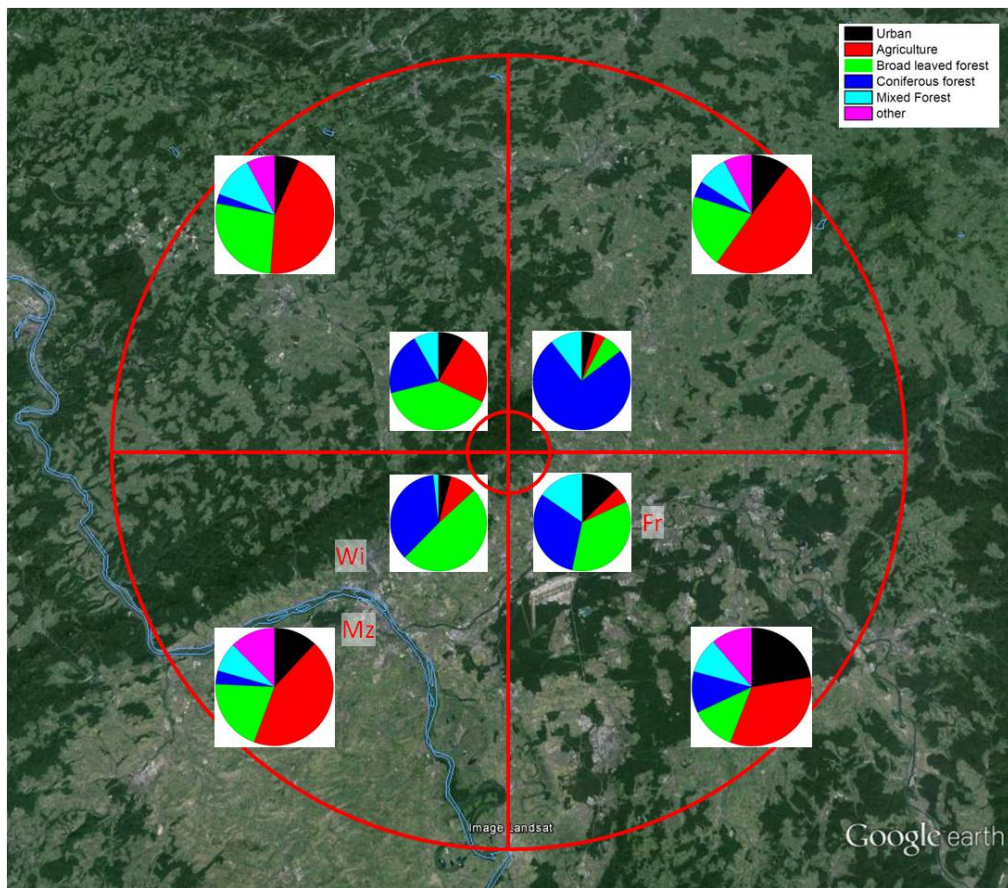

**Fig. S1.** Land-use in the area surrounding the PARADE campaign measurement site. The inner circle has a radius of 5 km, the outer circle a radius of 50 km. Both areas are divided into four sectors (North-East, South-East, South-West and North-West). For each of the 8 sectors the land-use is given by a pie chart. The Fr, Wi and Mz symbols represent the approximate location of the cities Frankfurt, Wiesbaden and Mainz, respectively. The map was generated from the CORINE Land Cover database by Dr. Pablo J. Hidalgo.

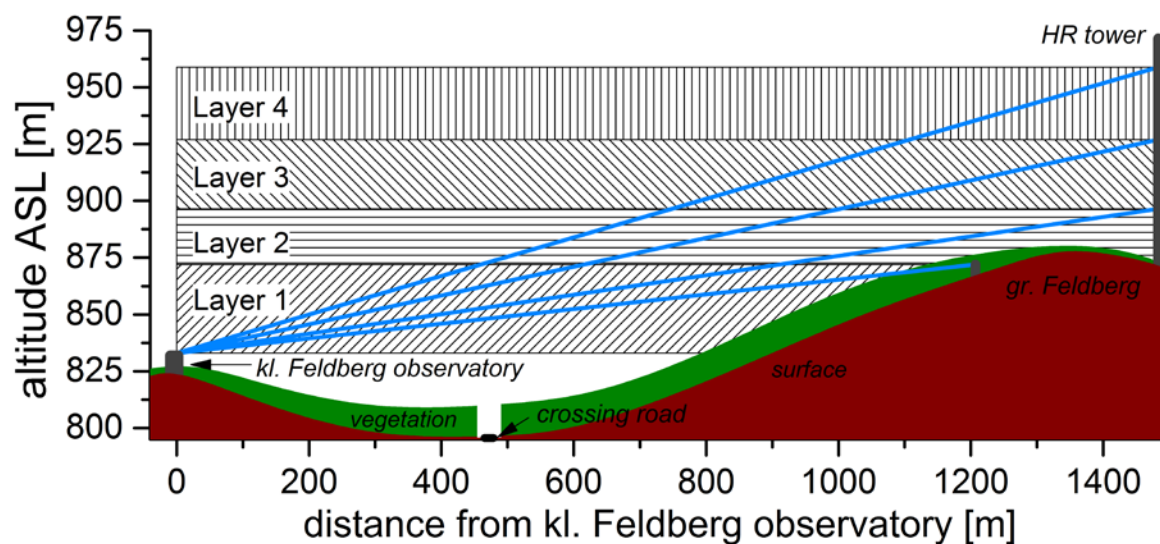

**Fig. S2.** Schematic diagram of the LP-DOAS light-paths deployed during the PARADE campaign, with the “Kleiner Feldberg” on the left and the “Grosser Feldberg” on the right. The LP-DOAS datasets used in this work are those obtained from the lower-most and upper-most light paths.

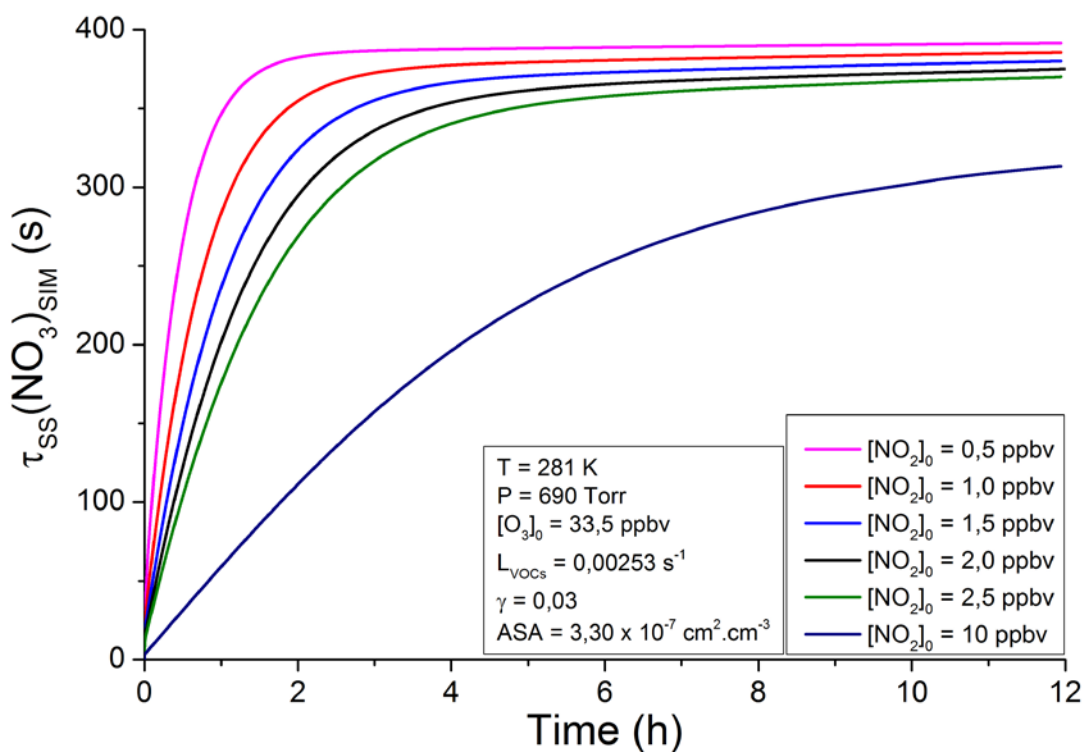

**Fig. S3.** Simulated evolution of the steady state lifetime of  $\text{NO}_3$  assuming reaction of  $\text{NO}_2$  with  $\text{O}_3$  as the only  $\text{NO}_3$  source, and both a homogeneous and a heterogeneous loss process. The simulation assumes variable  $[\text{O}_3]$  and  $[\text{NO}_2]$  as would be the case for a point source and a constant  $\text{NO}_3$  reactivity in the gaseous phase ( $0.00253 \text{ s}^{-1}$ , due e.g. to VOCs). The different curves each correspond to a different initial  $\text{NO}_2$  mixing ratio (with a fixed initial  $[\text{O}_3]$  for each simulation). The  $\text{NO}_3$  losses through  $\text{N}_2\text{O}_5$  uptake on aerosols is simulated by keeping the aerosol surface area (ASA) and the uptake coefficient  $\gamma$  constant at the values listed in the figure. The overall heterogeneous sink, depending on  $[\text{NO}_2]$ , is thus different for each simulation, which explains the slightly different effective lifetime ( $\tau_{\text{ss}}(\text{NO}_3)$  for  $t \rightarrow \infty$ ). At short times, the true steady state lifetime (350 to 380 s) is underestimated.

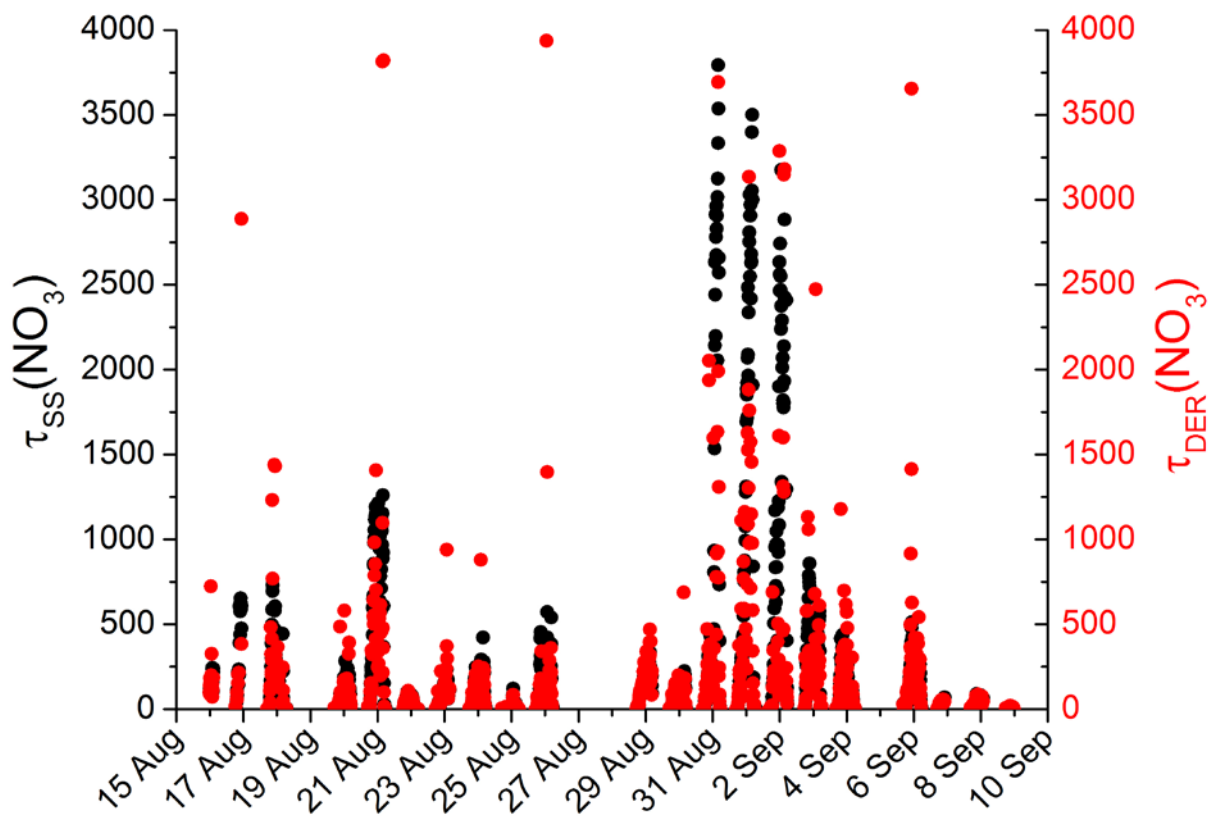

**Fig. S4.** Comparison between  $\tau_{ss}(\text{NO}_3)$  and  $\tau_{\text{DER}}(\text{NO}_3)$  using the same  $[\text{NO}_3]$ ,  $[\text{NO}_2]$  and  $[\text{O}_3]$  datasets. For most of the nights both values agree even though out of range values for  $\tau_{\text{DER}}(\text{NO}_3)$  are sometimes calculated.

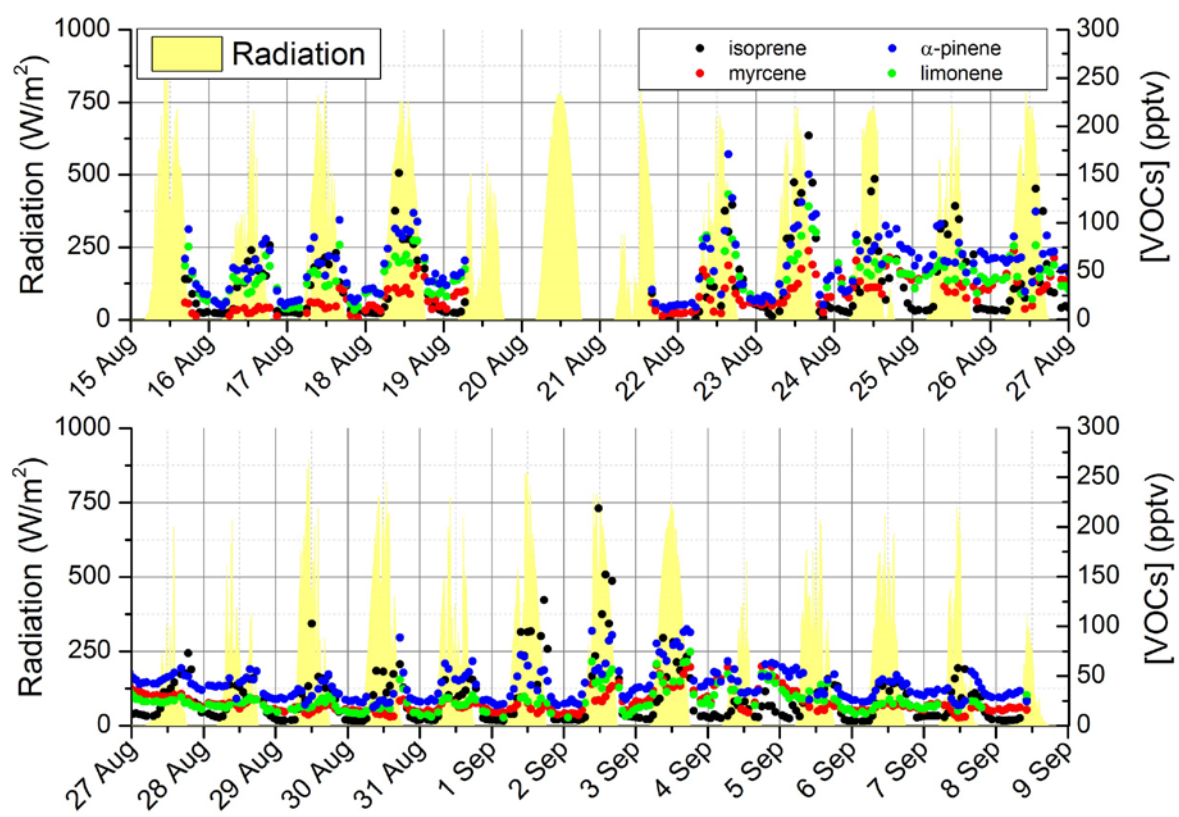

**Fig. S5.** Time series of the mixing ratios of the reactive (highlighted) VOCs in Table 2.

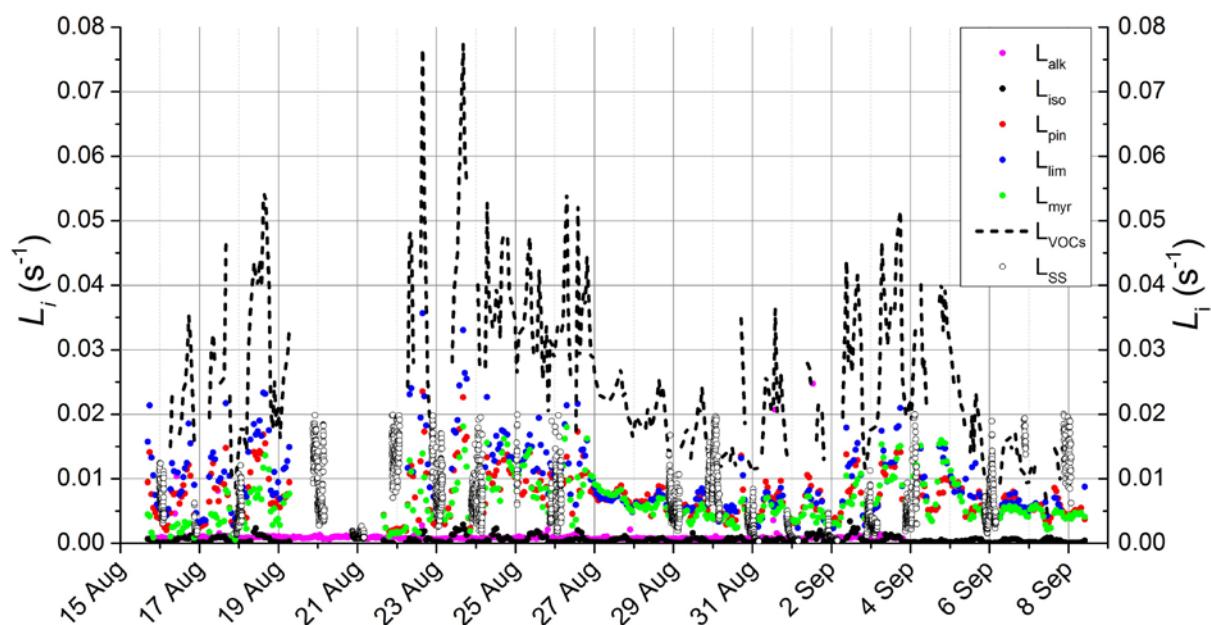

**Fig. S6.** Individual and summed reactivities (towards  $\text{NO}_3$ ) of the VOCs listed in Table 2.  $L_{\text{iso}}$ ,  $L_{\text{pin}}$ ,  $L_{\text{lim}}$  and  $L_{\text{myr}}$  represent respectively the losses due to isoprene,  $\alpha$ -pinene, limonene and myrcene. All the alkenes and alkanes reactivities are summed in the  $L_{\text{alk}}$  term. The  $L_{\text{VOCs}}$  term sums up the individual terms ( $L_{\text{iso}}$ ,  $L_{\text{pin}}$ ,  $L_{\text{lim}}$ ,  $L_{\text{myr}}$  and  $L_{\text{alk}}$ ). The steady-state loss rate constant for  $\text{NO}_3$  ( $L_{\text{ss}}$ ) is also plotted.



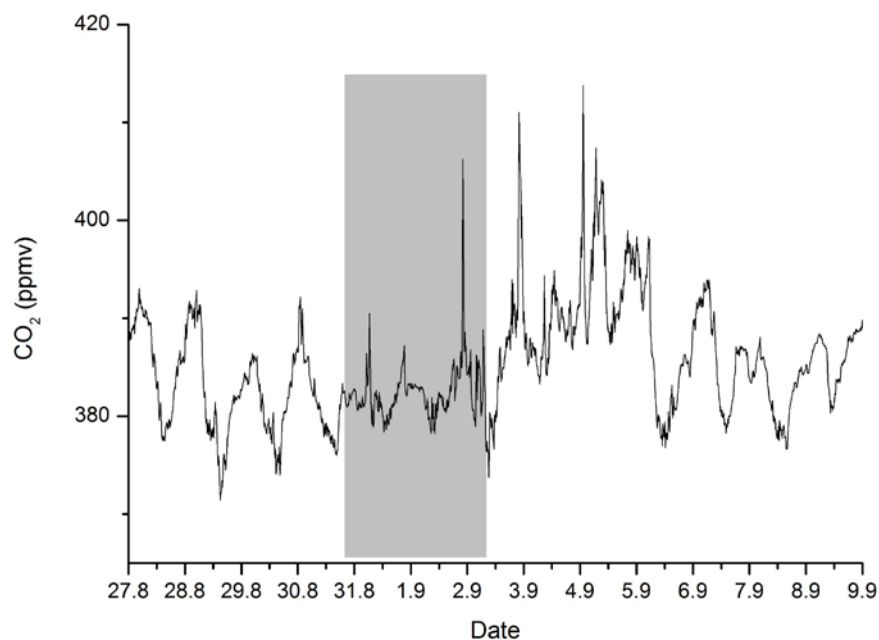

**Fig. S7.** CO<sub>2</sub> during PARADE. The grey shaded area indicates no significant nocturnal build-up of CO<sub>2</sub> (contrast e.g. the nights of 27.8 - 30.8 or 6.9 - 9.9) and is coincident with NO<sub>3</sub> lifetimes exceeding 2000 s.



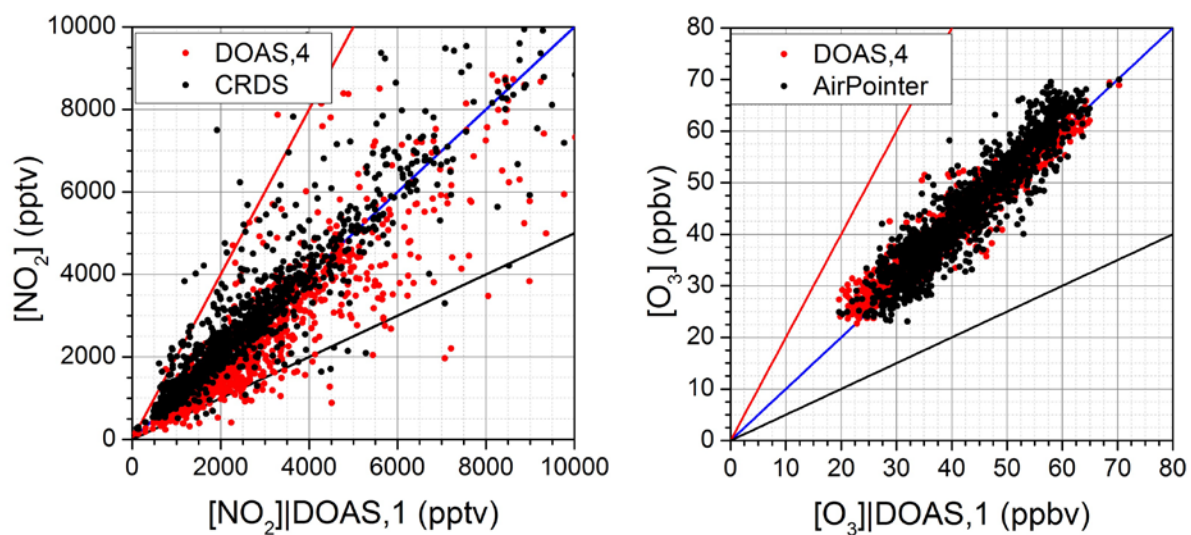

**Fig. S8.** Left panel: comparison between  $[\text{NO}_2]_{\text{CRDS}}$ ,  $[\text{NO}_2]_{\text{DOAS},4}$  and  $[\text{NO}_2]_{\text{DOAS},1}$  (whole campaign) Right panel: comparison between  $[\text{O}_3]_{\text{CRDS}}$ ,  $[\text{O}_3]_{\text{DOAS},4}$  and  $[\text{O}_3]_{\text{DOAS},1}$  (whole campaign). Blue lines have a gradient of 1, red lines a gradient of 2 and black lines a gradient of 0.5.
